# Supplementary material for: Plasma virome of cattle from forest region revealed diverse small circular ssDNA viral genomes
Source: PubMed Central journal article supplement (PMC5769433; doi:10.1186/s12985-018-0923-9), 2018-01-15
Supplement: 12985_2018_923_MOESM1_ESM.pdf [file 12985_2018_923_MOESM1_ESM.pdf]

Additional file 1: Primers used in the specific screening PCR and inverse PCR.

| Primer's ID | Target virus | Application                 | Sequence(5'-3')         | Fragment size(bp) | Annealing temperature(°C) | No. of cycles |
|-------------|--------------|-----------------------------|-------------------------|-------------------|---------------------------|---------------|
| BC-CH1 WS   | Bvch001      | Screening<br>(first round)  | AGAGGGGGTCAGCAAGAAGA    | 560               | 50                        | 30            |
| BC-CH1 WX   |              |                             | CACGGGACAACCTGCCTAGT    |                   |                           |               |
| BC-CH1 NS   | Bvch001      | Screening<br>(second round) | GCATCGGACACATGGGACTA    | 350               | 53                        | 32            |
| BC-CH1 NX   |              |                             | TGATGAGCCCGTCCTTTATGG   |                   |                           |               |
| BC-CH2 WS   | Bvch002      | Screening<br>(first round)  | TCTTGACCACTAAGCCGTATGT  | 580               | 48                        | 30            |
| BC-CH2 WX   |              |                             | GACTACAGCACTGGAGCTCTT   |                   |                           |               |
| BC-CH2 NS   | Bvch002      | Screening<br>(second round) | AGAGGAACAACACAACAGAACAT | 330               | 53                        | 32            |
| BC-CH2 NX   |              |                             | GCCTTTATAACCATCCCACCATT |                   |                           |               |
| BC-CH5 WS   | Bvch005      | Screening<br>(first round)  | TGGTTCTTGGGTGGTATAGTTTC | 650               | 49                        | 32            |
| BC-CH5 WX   |              |                             | AGACTCTCACTTACACGCTTTCA |                   |                           |               |
| BC-CH5 NS   | Bvch005      | Screening<br>(second round) | AGTGAAGGTGCCTGGTCTA     | 320               | 53                        | 32            |

---

|           |         |                             |                          |     |    |    |
|-----------|---------|-----------------------------|--------------------------|-----|----|----|
| BC-CH5 NX |         |                             | AACTTCTGCACACACGGTAT     |     |    |    |
| BG-CH1 WS | BGmv001 | Screening<br>(first round)  | CCCCAATGATCGTGCCCATA     | 640 | 48 | 32 |
| BG-CH1 WX |         |                             | CATGTTGATGGCGGAACTCAT    |     |    |    |
| BG-CH1 NS | BGmv001 | Screening<br>(second round) | AAGCGACGGGTAAGATAACC     | 330 | 53 | 32 |
| BG-CH1 NX |         |                             | CATCATACGGCACACCTGAAA    |     |    |    |
| BG-CH2 WS | BGmv002 | Screening<br>(first round)  | TGAACTCTTTCTGAGCTCCAAAGA | 550 | 48 | 32 |
| BG-CH2 WX |         |                             | AGCTCGTGGTTTGACTAAGG     |     |    |    |
| BG-CH2 NS | BGmv002 | Screening<br>(second round) | TCTGGCCCATTCAGTCTTACC    | 320 | 53 | 32 |
| BG-CH2 NX |         |                             | ACTGGCATCCTTCCACTGAAA    |     |    |    |
| R-NS002C  | Bvch002 | Inverse PCR                 | TCTCAGGCTGCATCCACACAT    | 620 | 54 | 32 |
| R-NX002C  |         |                             | ACTACGTGCGGTAGAGCTGG     |     |    |    |
| R-NS005C  | Bvch005 | Inverse PCR                 | TCCCAGTGCCAGTACACATAC    | 450 | 53 | 32 |
| R-NX005C  |         |                             | CTCCGAGGGTGCAAGAAGTT     |     |    |    |
| R-NS001G  | BGmv001 | Inverse PCR                 | CCACAACACGAGGGATAATTTTC  | 350 | 56 | 32 |

---

---

R-NX001G

GGGAGACACGCCTATTTG

R-NS002G

BGmv002

Inverse PCR

TCACCGTGTCACCCATACTC

580

56

32

R-NX002G

GGCATTCTTTGGAGCTCAGAAA

---
