# Supplementary material for: Plasma virome of cattle from forest region revealed diverse small circular ssDNA viral genomes
Source: Springer Nature journal article supplement (doi:10.1186/s12985-018-0923-9), 2018-01-15
Supplement: MOESM2 [file 15365658]

>CattleB02Bovine\_Papillomavirus

TTTGACAGCCCTCATCAAACCTCATTACAAACATAGATTTGCCTGTATTAGG  
TGGGCCTACAATCACCATGCAGTTCTTCTTAGGAACACTGTGCAACAAAT  
CTTTGAAAGCAGCTAGGAACTTAAAAAATTCACATTTTGAAACTTTAGA  
AACTGCACAATTGTTTTAAAGTCTCCCGTCCCCTCTATTTGACTAATACAT  
TTCTTGATCCACTGCCCCATAGTCATTTCTCTCATTTCAGCGG

>CattleB02Bovine\_papillomavirus

ATCAGTCCAGTTAGTTTAAATTGTGAAGAAGAGGAATTAGAGGTTGAGGA  
AGTAGATTGCCCTAATCCTTATGCAATTGAGACAGCTTGTTATGTTTGTGA  
AGACATACTACGCATAGCTGTTGTAACCTCGAACGACGGAATCCGGGACC  
TGCAACAACCTGCTGCTGAGCAGCCTTTTTCTACTGTGTGCAAGTTGTTCTA  
GAGAAGCTTTTTGCCTTCGCAGAGCGCATCAGAATGGATAAAGGTATT

>CattleB02Bovine\_Papillomavirus

ATTGCATATTATTATGCTAGGTTAGCTGAGGTGGATTCTAATGCTGCAGCC  
TTTTTGAAGTGCAACAACCAGGTTAAGCATGTGAAAGAGTGTGCTCAAAT  
GACTAGGTACTACAAAACCGCTGAAATGAGAGAAATGACTATGGGGCAG  
TGGATCAAGAAATGTATTAGTCAAATAGAGGGGACGGGAGACTTTAAAC  
AATTGTGCAGTTTCTAAAGTTTCAAATGTGAATTTTTTAAGTTTCCTAG

>CattleB02Bovine\_Papillomavirus

GTTACTCTGACTGGTTATGCATTGTAAAGGCTTACGAGGTGGCAGTGTTAA  
CTTTGTTTTGCAGCGCTGATCTCCGTATGGAAATCGAAAGCCTCCTGTTG  
TGCAAACAATTCTGCGGAATCCCTTGCTCGCATTTCAGCATTATCAATTAG  
GTCAGACAAATCAGACACACTTTCTTCACACCCAACCTTCACTATCAGATTG  
ACTACATTGTGCTTGATCGTCTA

>CattleB02Dromedary\_picobirnavirus

ATTATGCCTAAAAATAATGAAACTAAATGGAAGGAAATTCAATTTGATGA  
TTGTTTTAACCTTCCCAATCCAGGTTTACGGTCTTATTTTGACATAGTCAGA  
AAAGGACAACCTGACGAGTACAGAACCACCTTTGCAAAGGGTGACTCGTT  
AAATAAAGTTCTGAACGATTGGAGACCTACACTTGAGTCGTTATCTGACA  
AGTGGCCTACACTTGTAGATTTTGAAAACGACTTAAAGGCTAAGGTCG

>CattleB02Dromedary\_picobirnavirus

CTTTAATCTGCCTAATCCAGGGCTTCGGTCTTATTTTGACATCGTCAGAAA  
AGGCCAACCCGACGAGTACAGGACCACTTTCGCCAAGGGTGATTCGGTTCG  
AGAAGGTCCTGAACGATTGGAGTTCCACACTCGAATCGGTCGC

>CattleB02Dromedary\_picobirnavirus

TAATGATCGATGTCTTCAAGCCTTTCAGACAGTGGCTTCATGATAGACAGC  
GGTCCGACCTTAGCCTTTAAGTCGTTTTCAAATCTACAAGTGTAGGCCAC  
TTGTCAGATAACGACTCAAGTGTAGGTCTCCAATCGTTCAGAACTTTATTT  
AACGAGTCACCCTTTGCAAAGGTGGTTCTGTACTCGTCAGGTTGTCCTTTT  
CTGACTA
